# Supplementary material for: Oxygen-incorporated and layer-by-layer stacked WS2 nanosheets for broadband, self-driven and fast-response photodetection
Source: Royal Society of Chemistry journal article supplement (doi:10.1039/c8nr10350j), 2019-01-01
Supplement: c8nr10350j1.pdf [file c8nr10350j1.pdf]

Electronic Supplementary Information (ESI)

Oxygen-incorporated and layer-by-layer stacked WS<sub>2</sub>  
nanosheets for broadband, self-driven and fast-response  
photodetection

Jun Xu,<sup>\*a</sup> Xialan Cheng,<sup>a</sup> Tong Liu,<sup>a</sup> Yongqiang Yu,<sup>\*a</sup> Lingling Song,<sup>a</sup> Yu  
You,<sup>a</sup> Tao Wang,<sup>a</sup> and Junjun Zhang<sup>\*b</sup>

<sup>a</sup>School of Electronic Science & Applied Physics, Hefei University of  
Technology, Hefei 230009, P. R. China. E-mail: [apjunxu@hfut.edu.cn](mailto:apjunxu@hfut.edu.cn) (J. Xu);  
[yongqiangyu@hfut.edu.cn](mailto:yongqiangyu@hfut.edu.cn) (Y. Yu)

<sup>b</sup>Department of Materials Science and Engineering, Southern University of Science  
and Technology, Shenzhen 518055, P.R. China. E-mail: [cnjjzhang@gmail.com](mailto:cnjjzhang@gmail.com) (J.  
Zhang)

Table S1 Recent advance of WS<sub>2</sub>-based photodetectors.

| Device                                                                            | Synthetic method      | Responsivity                                            | Detectivity (Jones)   | Response time ( $\tau_r/\tau_f$ ) | Incident light (nm) | Ref.                                               |
|-----------------------------------------------------------------------------------|-----------------------|---------------------------------------------------------|-----------------------|-----------------------------------|---------------------|----------------------------------------------------|
| WS <sub>2</sub> film / SiO <sub>2</sub> / p-Si                                    | CVD                   | 5.7 A W <sup>-1</sup> (365.5 $\mu$ W cm <sup>-2</sup> ) | —                     | 670/998 $\mu$ s                   | 660                 | ACS Appl. Mater. Interfaces, 2016, 8, 18375–18382. |
| WS <sub>2</sub> film /CH <sub>3</sub> NH <sub>3</sub> PbI <sub>3</sub> / Sapphire | CVD                   | 17 A W <sup>-1</sup> (0.2 $\mu$ W cm <sup>-2</sup> )    | $\sim 10^{12}$        | 2.7/7.5 ms                        | 505                 | Adv. Mater., 2016, 28, 3683–3689.                  |
| Few-layered WS <sub>2</sub> nanosheets                                            | CVD                   | 92 $\mu$ A W <sup>-1</sup>                              | NA                    | 5.3/5.3 ms                        | 568                 | Adv. Funct. Mater., 2013, 23, 5511–5517.           |
| Bi/WS <sub>2</sub> film/ Si                                                       | PLD                   | 0.42 A W <sup>-1</sup> (6 mW cm <sup>-2</sup> )         | $1.36 \times 10^{13}$ | >100 ms                           | 635                 | ACS Appl. Mater. Interfaces, 2015, 7, 26701–26708. |
| WS <sub>2</sub> nanofilms                                                         | Magnetron Sputtering  | 53.3 A W <sup>-1</sup>                                  | $\sim 10^{11}$        | NA                                | 365                 | Sci. Rep. 2016, 6, 20343.                          |
| WS <sub>2</sub> films                                                             | PLD                   | 0.70 A W <sup>-1</sup> (18 mW cm <sup>-2</sup> )        | $2.7 \times 10^9$     | 4.1/4.4 s                         | 635                 | Nanoscale, 2015, 7, 14974–14981.                   |
| WS <sub>2</sub> film/ SiO <sub>2</sub> / n-Si                                     | CVD                   | 18.8 mA W <sup>-1</sup>                                 | NA                    | < 4.5 ms                          | 532                 | Nanoscale, 2015, 7, 5974–5980.                     |
| WS <sub>2</sub> nanosheets aligned on Si wafer                                    | Solvothermal reaction | 1.54 A W <sup>-1</sup> (1.55 $\mu$ W cm <sup>-2</sup> ) | $2.0 \times 10^{12}$  | 2.0/7.2 $\mu$ s                   | 650                 | This work                                          |

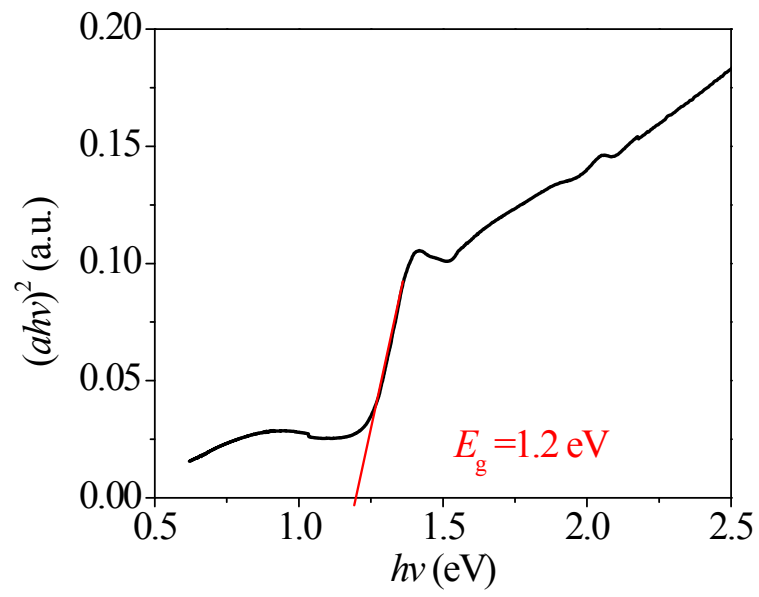

Fig. S1 The  $(\alpha h\nu)^2$  vs.  $h\nu$  curve of the oxygen-incorporated  $\text{WS}_2$  nanosheets to determine the bandgap.

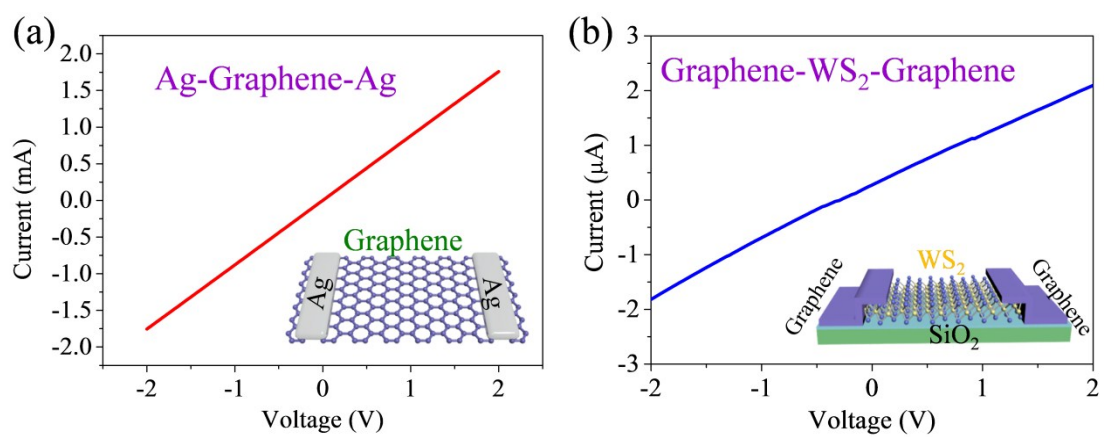

Fig. S2 I-V curves of (a) the Ag-Graphene-Ag and (b) the Graphene-WS<sub>2</sub>-Graphene devices on SiO<sub>2</sub> substrates, showing good Ohmic contacts in both devices.
